# Supplementary material for: A β-cyclodextrin enhanced polyethylene terephthalate film with improved contact charging ability in a high humidity environment
Source: Royal Society of Chemistry journal article supplement (doi:10.1039/d1na00341k), 2021-01-01
Supplement: d1na00341k1.pdf [file d1na00341k1.pdf]

*Supporting Information*

**$\beta$ -cyclodextrin enhanced polyethylene terephthalate film with improved contact charging ability in high humidity environment**

Nannan Wang<sup>a,b,#</sup>, Yizhe Liu<sup>a,b,#</sup>, Yang Wu<sup>c</sup>, Zibiao Li<sup>d,e,\*</sup>, Daoai Wang<sup>a,c,\*</sup>

<sup>a</sup> State Key Laboratory of Solid Lubrication, Lanzhou Institute of Chemical Physics, Chinese Academy of Sciences, Lanzhou 730000, China;

<sup>b</sup> Center of Materials Sciences and Opto-Electronic Technology, University of Chinese Academy of Sciences, Beijing, 100049, China

<sup>c</sup> Qingdao Center of Resource Chemistry and New Materials, Qingdao 266100, China;

<sup>d</sup> Institute of Materials Research and Engineering, A\*STAR (Agency for Science, Technology and Research), 2 Fusionopolis Way, Innovis, #08-03, Singapore 138634, Singapore

<sup>e</sup>Department of Materials Science and Engineering, National University of Singapore, Singapore 117575, Singapore

\*Corresponding Author. Tel: +86-931-4968169; E-mail: wangda@licp.cas.cn; lizb@imre.a-star.edu.sg

#These authors contributed equally to this work and should be considered co-first authors.

## Supplementary Figures

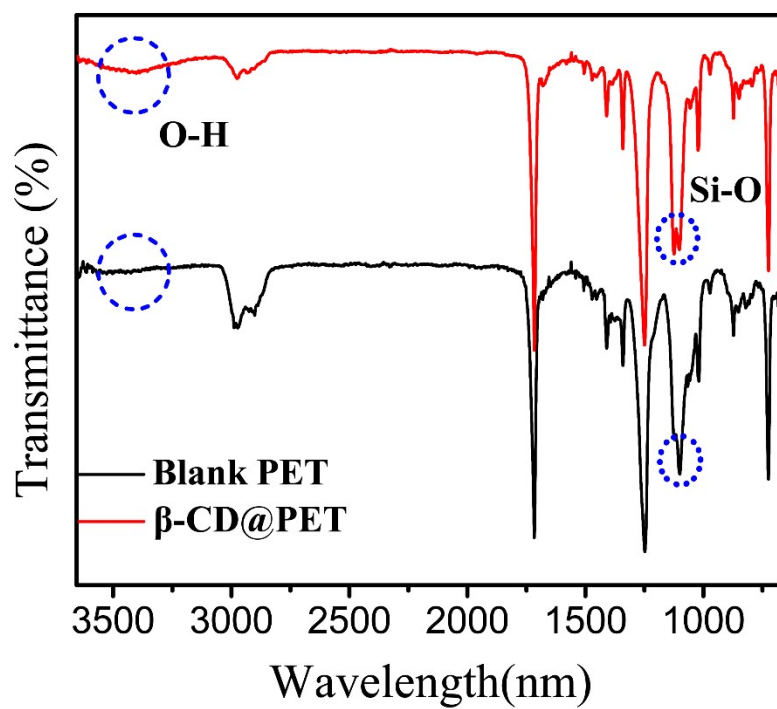

Supplementary Figure 1. Infrared spectra of blank PET film and modified PET film.

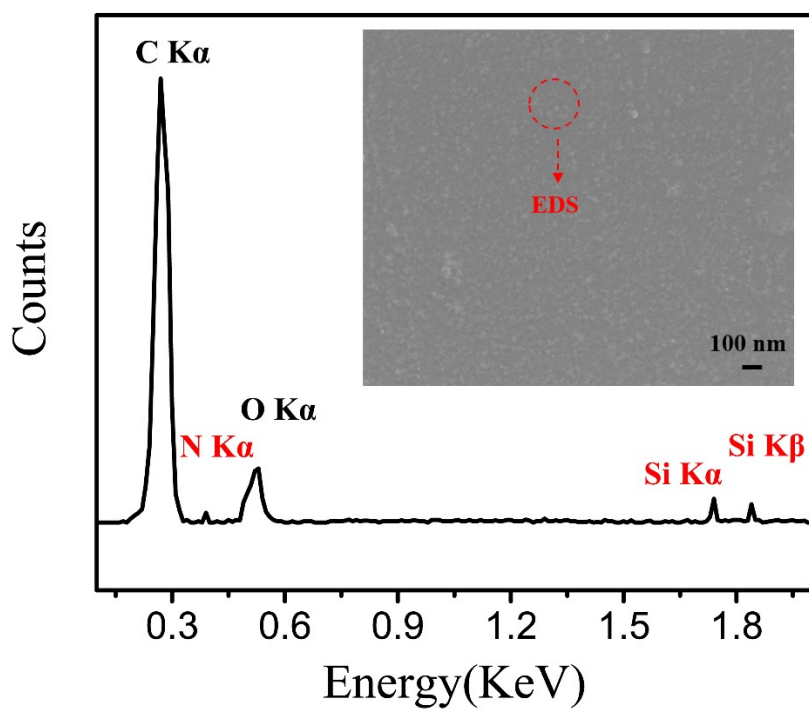

Supplementary Figure 2. SEM and EDS of  $\beta$ -CD@PET film.

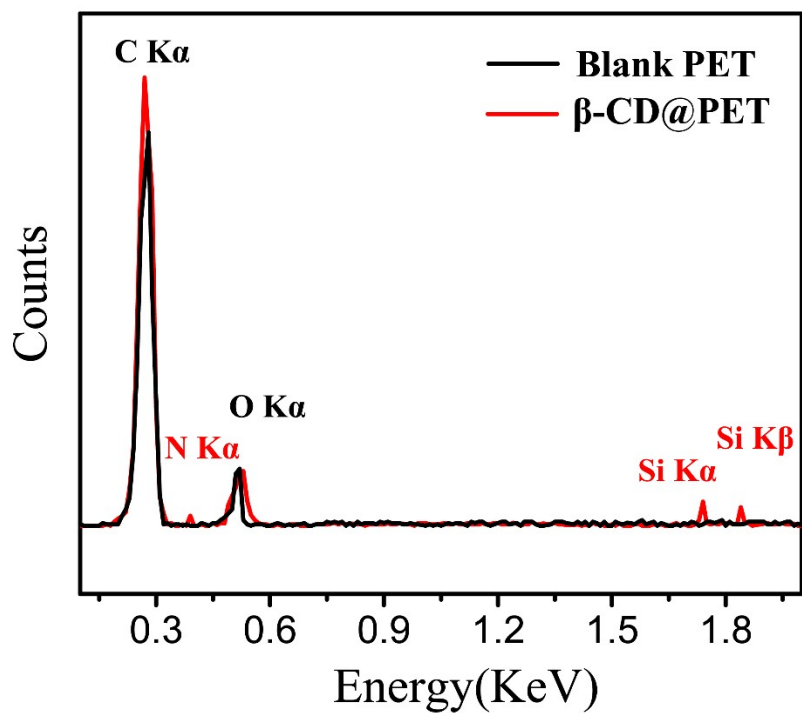

**Supplementary Figure 3.** SEM and EDS of blank PET and  $\beta$ -CD@PET film.

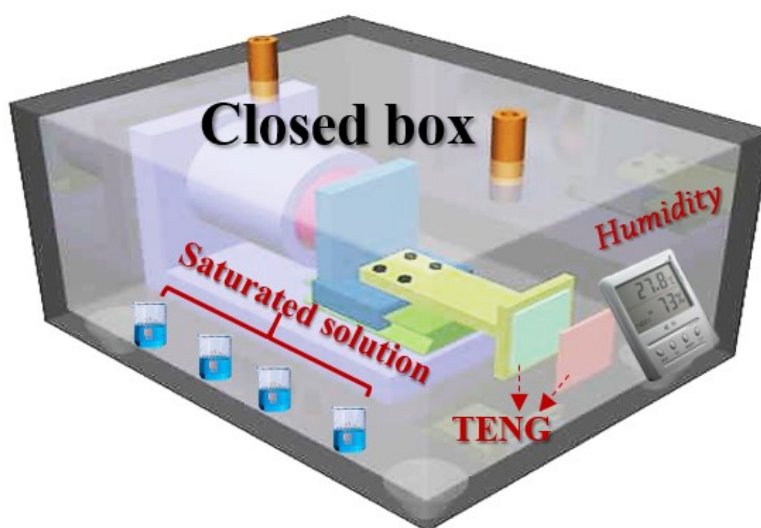

**Supplementary Figure 4.** Schematic diagram of TENG electrical output test in a closed box with controlled different humidity.

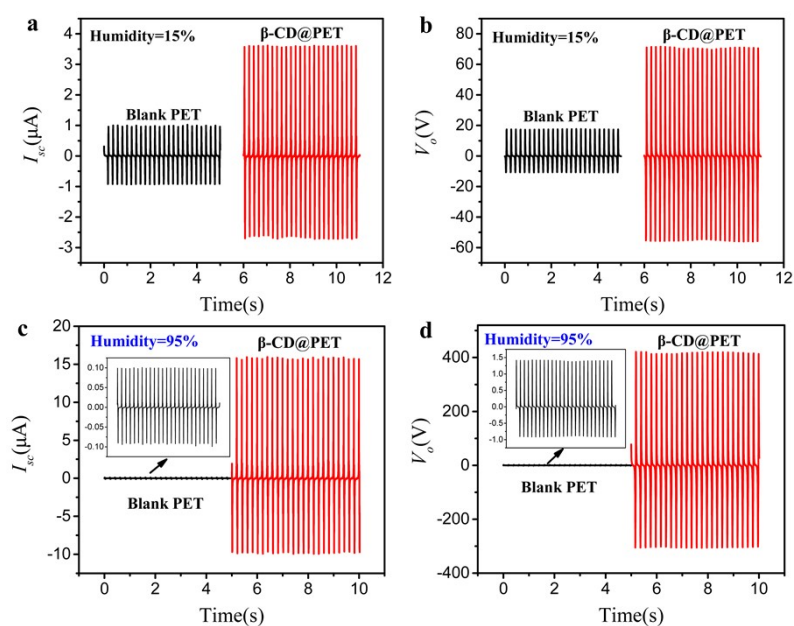

**Supplementary Figure 5.** Contrast of  $I_{sc}$  and  $V_o$  of blank PET-based and  $\beta$ -CD@PET-based TENG at 15% RH (a, b) and 95% RH (c, d).

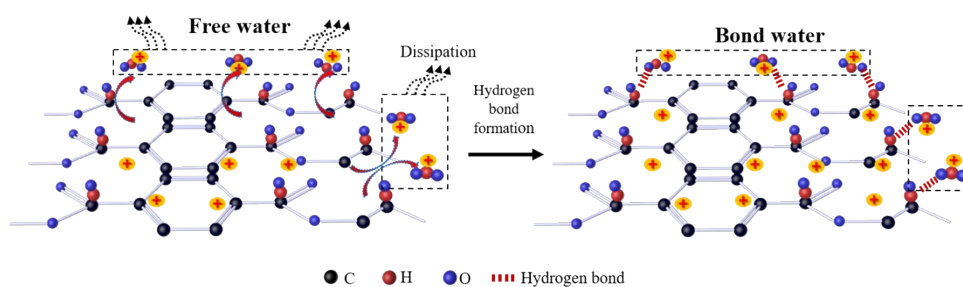

**Supplementary Figure 6.** Mechanism of water molecules immobilization on PVA film surface and participating in triboelectric charging.

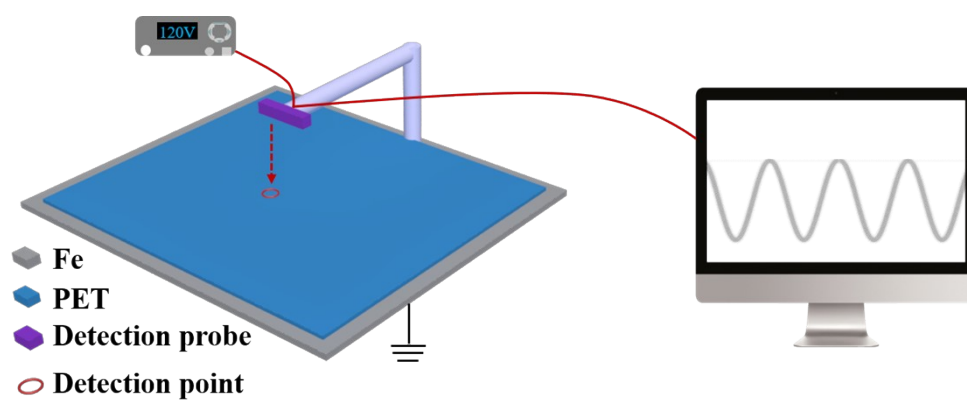

**Supplementary Figure 7.** Schematic of the surface potential test.

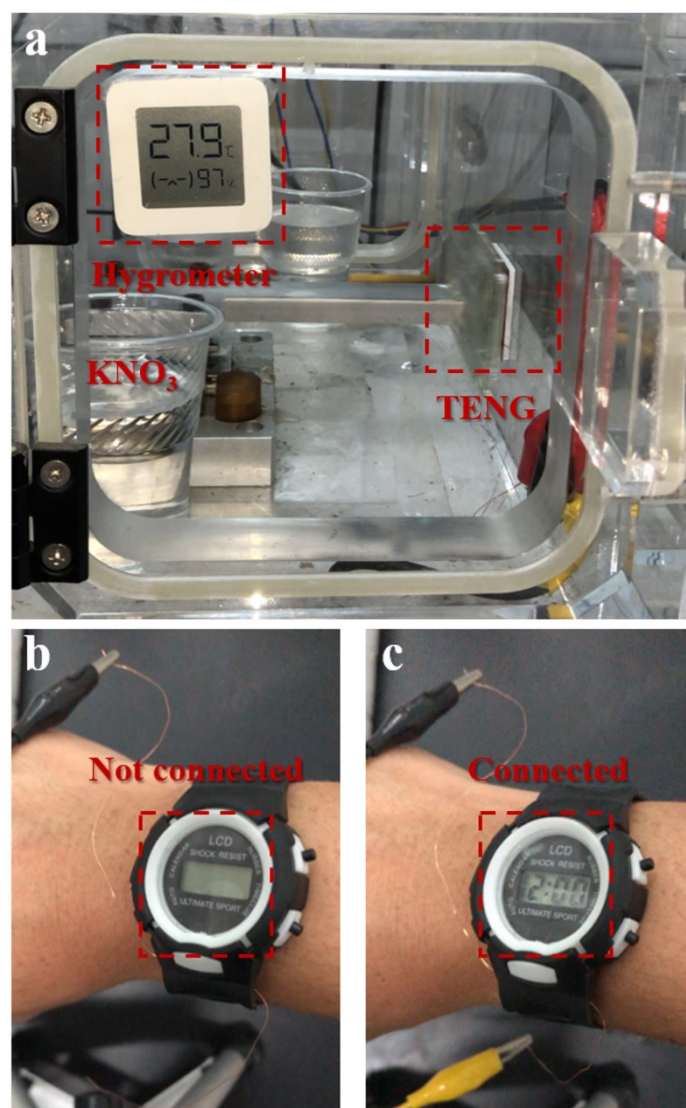

**Supplementary Figure 8.** Demonstration experiment of  $\beta$ -CD@PET-based TENG for powering electronic watch at 97%RH.

### *Supplementary Videos*

**Supplementary Video 1:** Demonstration experiment of lighting of blank PET-based TENG under 95% humidity. Blank PET-based TENG can light up 22 LEDs.

**Supplementary Video 2:** Demonstration experiment of lighting of  $\beta$ -CD@PET -based TENG under 95% humidity.  $\beta$ -CD@PET -based TENG can light up 248 LEDs.

**Supplementary Video 3:** Demonstration experiment of  $\beta$ -CD@PET-based TENG for powering electronic watch at 97%RH.
